# Supplementary material for: A Systematic Review of Interventions for Health Anxiety Presentations Across Diverse Chronic Illnesses
Source: Springer Nature journal article supplement (doi:10.1007/s12529-018-9748-6), 2018-11-29
Supplement: MOESM1 [file 16304596]

Table 1. Complete list of keywords by illness type used for the database search

| - “Fear of disease progression” “health worry” OR “health fear” OR “health anxiety” OR “fear of recurrence” AND chronic illness - “health worry” OR “health fear” OR “health anxiety” OR “fear of recurrence” AND chronic disease - “health worry” OR “health fear” OR “health anxiety” OR “fear of recurrence” AND stroke OR diabetes OR cardi* OR asthma OR epilepsy OR Parkinson OR HIV - “health worry” OR “health fear” OR “health anxiety” OR “fear of recurrence” AND Cancer OR Neoplasm - “health worry” OR “health fear” OR “health anxiety” OR “fear of recurrence” AND multiple sclerosis OR irritable bowel disease OR arthritis OR chronic kidney disease OR end-stage renal* - “cardiac anxiety” - “heart-focused anxiety” - “fear of hypoglycemia” AND diabetes - “fear of shock” AND implantable cardioverter defibrillatora - “fear” AND implantable cardioverter defibrillatora - “fear of dyspnea” AND (COPD OR asthma) - “fear of seizure” AND epilepsy - “fear of falling” AND Parkinson - “fear of pain” AND cancer OR neoplasm - “fear of pain” AND chronic paina |
| --- |

aThe results of these searches were excluded from the full article review phase
